# Supplementary material for: Rapid and label-free detection of aflatoxin B1 using a rationally truncated aptamer and via circular dichroism measurement
Source: Royal Society of Chemistry journal article supplement (doi:10.1039/d2cc00078d), 2022-01-01
Supplement: d2cc00078d1.pdf [file d2cc00078d1.pdf]

**Electronic Supplementary Information**

**Rapid and label-free detection of aflatoxin B1 by using a rationally truncated aptamer and via circular dichroism measurement**

Chao Wang, Kexiao Zhu, Pengfei Shi, Xilai Ding, Shusheng Zhang\*

Shandong Provincial Key Laboratory of Detection Technology for Tumor Markers, College of Chemistry and Chemical Engineering, Linyi University, Linyi 276005, People's Republic of China.

E-mail: shushzhang@126.com

## Experiment

### 1. Materials and methods

Assay buffer containing 10 mM Tris-HCl (pH 7.4), 20 mM MgCl<sub>2</sub>, 150 mM NaCl and 0.01% (v/v) tween20 was used. All DNA strands were synthesized by Sangon Biotech (Shanghai, China, <http://www.sangon.com>), and purified through HPLC. Their sequences were listed in **Table S1**. Mycotoxins including aflatoxin B1 (AFB1), fumonisins B1 (FB1), ochratoxin A (OTA), zearalenone (ZAE) and deoxynivalenol (DON) were purchased from Sangon Biotech (Shanghai, China). Beer was bought from a local supermarket. All aqueous solutions were prepared with ultrapure water with an electric resistivity of 18.2 MΩ·cm.

The CD measurements were performed on a circular dichroism spectropolarimeter (JASCO J-1500, Japan) with a thermostatic cell holder and nitrogen-purging facility. Following parameters were set, data acquisition interval 0.5 nm, response time 1 s, bandwidth 5 nm, scan speed 200 nm/min, accumulations times 3. One quartz cuvette with 1 cm path length was used for holding sample solution. Spectra were baseline subtracted with the CD signals from the buffer only. The data were collected from the triplicate scans, and all experiments were performed in duplicate.

### 2. Detection of AFB1

We mixed aptamer with AFB1 together in the assay buffer. The final aptamer concentration was 4 μM. After an incubation for 1 min, 400 μL of the mixture solution was transferred into a microsample quartz cuvette, and circular dichroism (CD) measurements were performed immediately. The CD signal value at 280 nm was recorded and used for AFB1 analysis.

### 3. Specificity test

To assess specificity of the short aptamer towards AFB1, some no-target mycotoxins (OTA, FB1, ZAE and DON), which probably co-existed with AFB1, were detected by using the short aptamer. Concentrations of the no-target mycotoxins were 1 μM. Other assay conditions were same with that for AFB1 detection.

### 4. Real samples analysis

We used 26nt to detected AFB1 spiked in methanol and beer samples, respectively. The beer was ultrasonicated to degas, and then filtered through a syringe filter (0.22 μm) before dilution with the assay buffer. Finally, different concentrations of AFB1 spiked in 20-fold diluted methanol and 50-fold diluted beer were detected, respectively, following above AFB1 detection procedures.

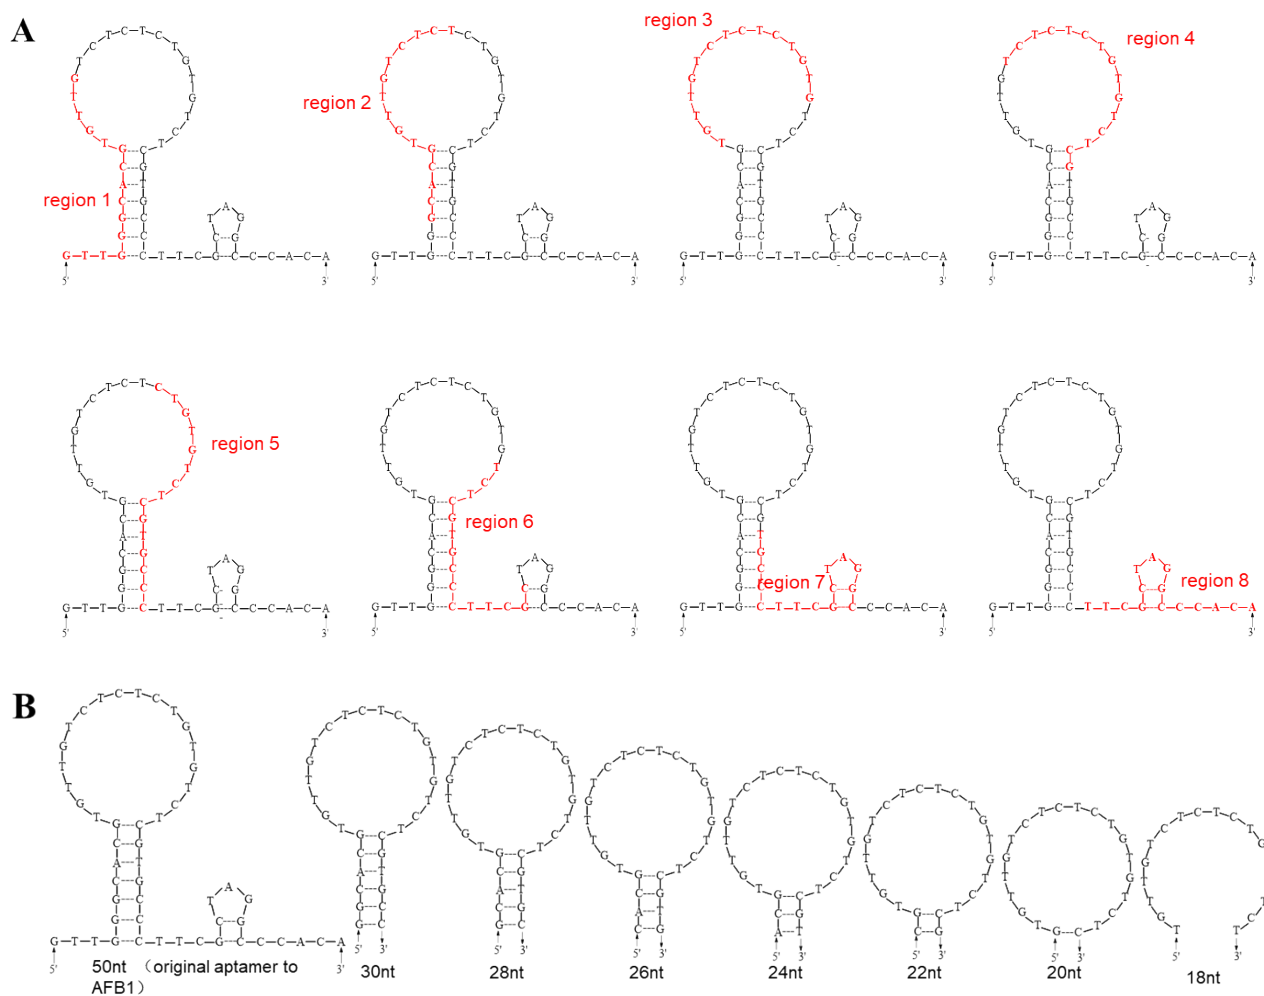

**Fig. S1.** (A) Different regions (region 1 to region 8) of the original aptamer 50nt, corresponding to hybridization regions with different cDNAs (C1 to C8). (B) Secondary structures corresponding to the original anti-AFB1 aptamer (50nt) and short aptamers (30nt, 28nt, 26nt, 24nt, 22nt, 20nt and 18nt), predicted by the UNAFold web server (<http://www.unafold.org/>).

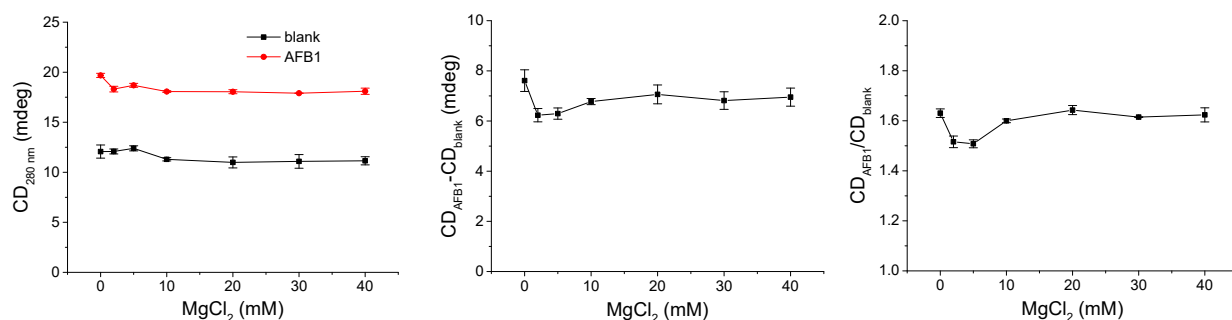

**Fig. S2.** Effects of different  $\text{MgCl}_2$  concentrations in assay buffer on detection performance. Assay buffer was 10 mM Tris-HCl (pH 7.5) containing 150 mM NaCl, 0.01 % tween20 and different concentrations of  $\text{MgCl}_2$ . AFB1 concentration was 500 nM, concentration of 26nt was 4  $\mu\text{M}$ .

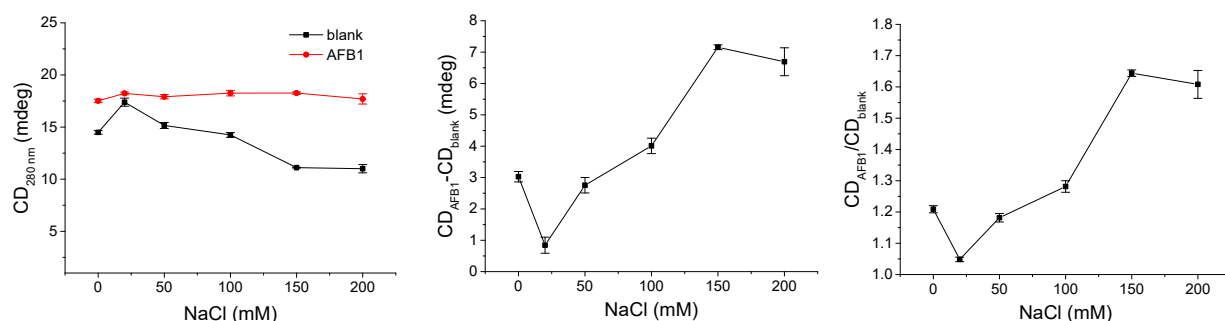

**Fig. S3.** Effects of NaCl concentrations in assay buffer on detection performance. Assay buffer was 10 mM Tris-HCl (pH 7.5) containing 20 mM  $\text{MgCl}_2$ , 0.01 % tween20 and different concentrations of NaCl. AFB1 concentration was 500 nM, concentration of 26nt was 4  $\mu\text{M}$ .

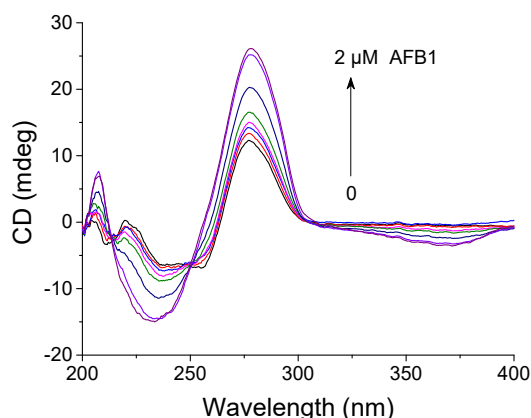

**Fig. S4.** CD spectra of this 26nt aptamer responses to different AFB1 concentrations. Assay buffer was 10 mM Tris-HCl (pH 7.5) containing 20 mM  $\text{MgCl}_2$ , 150 mM NaCl and 0.01 % tween20 at 25  $^{\circ}\text{C}$ . Concentration of 26nt was 4  $\mu\text{M}$ .

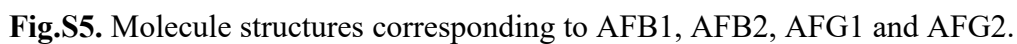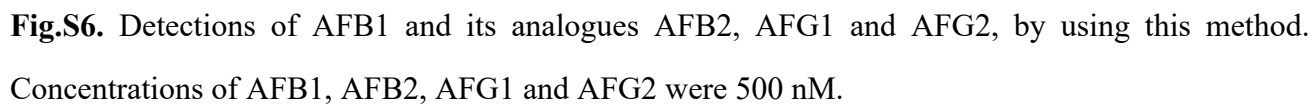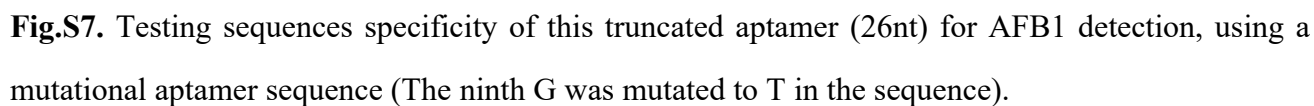

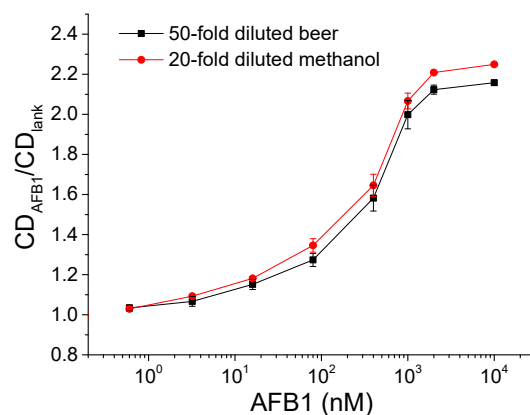

**Fig.S8.** Detection of different concentrations of AFB1 spiked in 20-fold diluted methanol and 50-fold diluted beer, respectively.

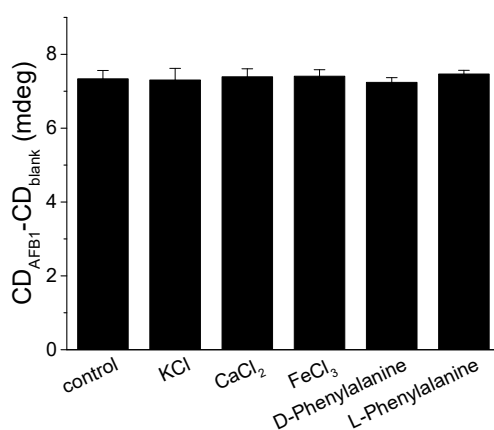

**Fig.S9.** Assessment of interferences from KCl (100 mM),  $CaCl_2$  (20 mM) and  $FeCl_3$  (5 mM), D-phenylalanine (10  $\mu$ g/mL) and L-phenylalanine (10  $\mu$ g/mL) on detection of AFB1 in 20-fold diluted methanol.

**Table S1.** Sequences of different DNA strands used in this work

| Category                    | Name   | Sequence (5' to 3' )                                   |
|-----------------------------|--------|--------------------------------------------------------|
| Original aptamer            | 50nt   | GTTGGGCACGTGTTGTCTCTCTGTGTCTCGTGCC<br>CTTCGCTAGGCCCACA |
| Short aptamer               | 30nt   | GGCACGTGTTGTCTCTCTGTGTCTCGTGCC                         |
|                             | 28nt   | GCACGTGTTGTCTCTCTGTGTCTCGTGC                           |
|                             | 26nt   | CACGTGTTGTCTCTCTGTGTCTCGTG                             |
|                             | 24nt   | ACGTGTTGTCTCTCTGTGTCTCGT                               |
|                             | 22nt   | CGTGTTGTCTCTCTGTGTCTCG                                 |
|                             | 20nt   | GTGTTGTCTCTCTGTGTCTC                                   |
|                             | 18nt   | TGTTGTCTCTCTGTGTCT                                     |
| Mutational DNA              | mutant | CACGTGTTTCTCTCTGTGTCTCGTG                              |
| Complementary DNA<br>(cDNA) | C1     | CAACACGTGCCCAAC                                        |
|                             | C2     | AGAGACAACACGTGC                                        |
|                             | C3     | CACAGAGAGACAACA                                        |
|                             | C4     | CGAGACACAGAGAGA                                        |
|                             | C5     | GGGCACGAGACACAG                                        |
|                             | C6     | GCGAAGGGCACGAGA                                        |
|                             | C7     | GCCTAGCGAAGGGCA                                        |
|                             | C8     | TGTGGGCCTAGCGAA                                        |

**Table S2.** Comparison of a few aptamer based assays for AFB1 with respect to dynamic range, analysis time, limit of detection (LOD) and label-free.

| Detection method   | Dynamic range      | LOD     | Analysis time | Label-free | References |
|--------------------|--------------------|---------|---------------|------------|------------|
| Fluorescence       | 1.6 nM-160 $\mu$ M | 1.4 nM  | >30 min       | No         | [1]        |
| Fluorescence       | 10-400 nM          | 3.4 nM  | 45 min        | No         | [2]        |
| Fluorescence       | 3.1-976 nM         | 1.1 nM  | >25 min       | No         | [3]        |
| Fluorescence       | 15.6-312 nM        | 5 nM    | >35 min       | No         | [4]        |
| Colorimetric       | 80-270 nM          | 7 nM    | 10 min        | Yes        | [5]        |
| Colorimetric       | 0.3 nM-32 $\mu$ M  | 0.32 nM | 70 min        | Yes        | [6]        |
| Electrochemical    | 5.0 pM-10 nM       | 0.4 pM  | 180 min       | No         | [7]        |
| Electrochemical    | 20 pM-1.6 nM       | 6.4 pM  | 135 min       | No         | [8]        |
| SERS sensor        | 3.2 fM-3.2 nM      | 1.3 fM  | 120 min       | No         | [9]        |
| RT-PCR             | 0.15 pM-15 nM      | 0.08 pM | >87 min       | Yes        | [10]       |
| Circular dichroism | 0.6 nM-2 $\mu$ M   | 0.6 nM  | 3 min         | Yes        | This work  |

References cited in Table S2:

1. Z. Lu, X. Chen, Y. Wang, X. Zheng and C. M. Li, *Microchim. Acta*, 2014, **182**, 571-578.
2. F. S. Sabet, M. Hosseini, H. Khabbaz, M. Dadmehr and M. R. Ganjali, *Food Chem.*, 2017, **220**, 527-532.
3. J. Zhang, Z. Li, S. Zhao and Y. Lu, *Analyst*, 2016, **141**, 4029-4034.
4. L. Chen, F. Wen, M. Li, X. Guo, S. Li, N. Zheng and J. Wang, *Food Chem.*, 2017, **215**, 377-382.
5. M. Hosseini, H. Khabbaz, M. Dadmehr, M. R. Ganjali and J. Mohamadnejad, *Acta Chimica Slovenica*, 2015, **62**, 721-728.
6. Y. Seok, J. Y. Byun, W. B. Shim and M. G. Kim, *Anal. Chim. Acta*, 2015, **886**, 182-187.
7. L. Wu, F. Ding, W. Yin, J. Ma, B. Wang, A. Nie and H. Han, *Anal. Chem.*, 2017, **89**, 7578-7585.
8. K. Abnous, N. M. Danesh, M. Alibolandi, M. Ramezani, A. S. Emrani, R. Zolfaghari and S. M. Taghdisi, *Biosens. Bioelectron.*, 2017, **94**, 374-379.
9. Q. Li, Z. Lu, X. Tan, X. Xiao, P. Wang, L. Wu, K. Shao, W. Yin and H. Han, *Biosens. Bioelectron.*, 2017, **97**, 59-64.
10. X. Guo, F. Wen, N. Zheng, Q. Luo, H. Wang, H. Wang, S. Li and J. Wang, *Biosens. Bioelectron.*, 2014, **56**, 340-344.
